# Supplementary material for: Both HLA class I and II regions identified as genome-wide significant susceptibility loci for adult-onset Still's disease in Chinese individuals
Source: PubMed Central journal article supplement — Ann Rheum Dis. 2019 Aug 30;79(1):161–3. doi: 10.1136/annrheumdis-2019-215239 (PMC6937403; doi:10.1136/annrheumdis-2019-215239), 2019-08-30
Supplement: annrheumdis-2019-215239supp001.pdf [file annrheumdis-2019-215239supp001.pdf]

**Both *HLA* class I and II regions identified as genome-wide significant susceptibility loci for adult-onset Still's disease in Chinese individuals**

**SUPPLEMENTARY INFORMATION**

|                                                                                                                               |    |
|-------------------------------------------------------------------------------------------------------------------------------|----|
| Table S1. Primers for Sanger sequencing confirmation.....                                                                     | 2  |
| Table S2. Association analysis for rs514410 ( <i>VEGFC</i> ).....                                                             | 3  |
| Table S3. Regulatory and epigenomic annotation of the SNPs with maximum evidence for being located in regulatory regions..... | 4  |
| Table S4. EQTL analysis for rs9268832 and rs3115628 from the GTEx2015_v6 study.....                                           | 24 |
| Table S5. Pair-wise LD analysis ( $r^2$ ) of the AOSD and JIA associated SNPs within the HLA region.....                      | 27 |
| Figure S1. Plot of the first two principal components from principal components analysis of our sample. ....                  | 28 |
| Figure S2. Quantile-quantile (Q-Q) plot of the GWAS analysis. ....                                                            | 29 |
| Figure S3. Manhattan plot of the GWAS analysis. ....                                                                          | 30 |
| Figure S4. Regional association plot of the <i>VEGFC</i> region. ....                                                         | 31 |
| Supplementary Methods.....                                                                                                    | 32 |
| Supplementary Discussion.....                                                                                                 | 35 |
| References.....                                                                                                               | 38 |

**Table S1.** Primers for Sanger sequencing confirmation

| <b>Variant</b> | <b>Type</b> | <b>Primer (5' to 3')</b> | <b>Melting Temperature</b> | <b>Product size (bp)</b> |
|----------------|-------------|--------------------------|----------------------------|--------------------------|
| rs9268791      | Forward     | TGGGTAACGAGGAGCTGAAT     | 57.2                       | 484                      |
|                | Reverse     | AGGGCACCAAGTCCAAAGA      | 57.9                       |                          |
|                | Sequencing  | CTGCCAGGTTCATGCCATTC     |                            |                          |
| rs3094178      | Forward     | AGATGGGAGCAGCCAGAAG      | 57.3                       | 686                      |
|                | Reverse     | GGAGCCAATCCTCACAAGC      | 57.9                       |                          |
|                | Sequencing  | TTGAGGAAGAACAATACTA      |                            |                          |
| rs514410       | Forward     | TTGACCGACTGGCTGAATG      | 57.2                       | 962                      |
|                | Reverse     | GCTGAGGTGGGAGGATTGC      | 59.9                       |                          |
|                | Sequencing  | AAGGTGGTAGGGAATAGGTT     |                            |                          |

**Table S2.** Association analysis for rs514410 (*VEGFC*)

| Analysis <sup>a</sup>            | RAF in cases <sup>b</sup> | RAF in controls <sup>b</sup> | OR    | SE    | P values | P_het |
|----------------------------------|---------------------------|------------------------------|-------|-------|----------|-------|
| Discovery                        | 0.097                     | 0.046                        | 2.252 | 0.173 | 2.68E-06 |       |
| Replication                      | 0.088                     | 0.049                        | 1.774 | 0.602 | 3.41E-01 |       |
| Fixed effect meta-analysis       | -                         | -                            | 2.211 | 0.166 | 1.81E-06 | 0.703 |
| Cochran-Mantel-Haenszel analysis | -                         | -                            | 2.192 | 0.164 | 9.68E-07 | -     |

RAF, frequency of risk allele; OR, odds ratio; SE, stand error; P\_het, p value for heterogeneity test across different cohorts using Cochran's Q test. <sup>a</sup>The discovery data set is comprised of 247 cases and 2,163 controls from the Northern and Central China; The replication data set is comprised of 17 cases and 257 controls from the Southern China. The fixed effect meta-analysis and Cochran-Mantel-Haenszel analysis are the combined analyses. <sup>b</sup>Risk allele is A allele.

**Table S3.** Regulatory and epigenomic annotation of the SNPs with maximum evidence for being located in regulatory regions

| SNP       | Association p value | Promoter histone marks                                                         | Enhancer histone marks                                                                                      | DNase                     | Proteins bound | Motifs changed                                                | RegulomeDB score <sup>a</sup> |
|-----------|---------------------|--------------------------------------------------------------------------------|-------------------------------------------------------------------------------------------------------------|---------------------------|----------------|---------------------------------------------------------------|-------------------------------|
| rs3115628 | 2.92E-08            | ESC, LNG, IPSC, FAT, STRM, BRST, BLD, MUS, BRN, SKIN, LIV, GI, HRT, SPLN, BONE | ESC, ESDR, LNG, IPSC, FAT, BRST, BLD, STRM, BRN, SKIN, VAS, LIV, GI, ADRL, PANC, MUS, THYM, HRT, SPLN, BONE | IPSC,BLD,BLD,BLD,SKIN,BLD | JUND           | Nrf1, TATA                                                    | 1f                            |
| rs2073044 | 2.62E-08            | SKIN, CRVX, VAS                                                                | ESC, ESDR, FAT, STRM, MUS, SKIN, KID, GI, LNG, CRVX, BRST, VAS, BRN, BONE                                   |                           | CFOS           | HDAC2, NF-E2, NF-Y, Pax-5                                     | 1f                            |
| rs9268528 | 4.44E-13            | SKIN, BRN                                                                      | IPSC, ESC, BRST, BLD, SKIN, GI, THYM, HRT, BRN                                                              | BLD,BLD                   |                | AP-1, BDP1, CACD, CHD2, GR, MAZ, PPAR, SP1, STAT, Sp4, ZNF263 | 1f                            |
| rs9268544 | 3.85E-13            |                                                                                |                                                                                                             |                           |                | ATF3, BHLHE40, Myc, NF-E2, SREBP, TFE                         | 1f                            |
| rs3135365 | 1.83E-08            | ESDR                                                                           | ESDR                                                                                                        |                           |                | Dobox4, Mef2, Pou3f1                                          | 1f                            |

| SNP       | Association p value | Promoter histone marks                                                                                             | Enhancer histone marks                                   | DNase                                                                                       | Proteins bound                                                                                        | Motifs changed | RegulomeDB score <sup>a</sup> |
|-----------|---------------------|--------------------------------------------------------------------------------------------------------------------|----------------------------------------------------------|---------------------------------------------------------------------------------------------|-------------------------------------------------------------------------------------------------------|----------------|-------------------------------|
| rs2395171 | 3.09E-07            |                                                                                                                    | FAT, LIV, GI                                             |                                                                                             |                                                                                                       |                | 1f                            |
| rs14004   | 1.36E-12            | ESC, IPSC, FAT, STRM, BRST, BLD, LIV, BRN, GI, ADRL, KID, LNG, MUS, PLCNT, THYM, HRT, PANC, SPLN, CRVX, SKIN, BONE | ESC, IPSC, FAT, BLD, LIV, BRN, GI, ADRL, MUS, THYM, SPLN | ESC,ESDR,ESDR,ESC,BLD,BLD,BLD,BLD,BLD,BLD,BLD,BLD,SKIN,ADRL,MUS,MUS,THYM,GI,OVRY,GI,BLD,BLD | NFKB,POL2,BCL3,BCLAF1,CFO5,OCT2,PAX5C20,POL24H8,POU2F2,RAD21,RFX5,SIN3AK20,TAF1,TBP,WHIP,YY1,SP1,USF2 |                | 1f                            |
| rs9268657 | 8.80E-13            | BLD, FAT, LIV, BRN, GI, ADRL, MUS, THYM, HRT, SPLN                                                                 | BLD, FAT, BRN, GI, THYM, LNG, MUS, SPLN                  |                                                                                             |                                                                                                       |                | 1f                            |
| rs9268831 | 8.85E-15            | ESC, LNG, FAT, STRM, BRST, BLD, BRN, SKIN, GI, ADRL, KID, MUS, THYM, HRT, PANC, PLCNT, SPLN                        | ESDR, BRST, BLD, SKIN, FAT, GI, MUS, PLCNT, PANC, SPLN   | LNG,MUS,GI,BLD,SKIN                                                                         | POL2,CMYC,HA2F1                                                                                       | Hsf            | 1f                            |
| rs9268832 | 3.41E-18            | ESC, LNG, FAT, STRM, BRST, BLD, BRN, SKIN, GI, ADRL, KID, MUS, THYM,                                               | ESDR, BRST, BLD, SKIN, FAT, GI, MUS, PLCNT, PANC, SPLN   | LNG,BLD                                                                                     | POL2,CMYC,HA2F1                                                                                       |                | 1f                            |

| SNP       | Association p value | Promoter histone marks                                                                      | Enhancer histone marks                                 | DNase | Proteins bound | Motifs changed        | RegulomeDB score <sup>a</sup> |
|-----------|---------------------|---------------------------------------------------------------------------------------------|--------------------------------------------------------|-------|----------------|-----------------------|-------------------------------|
|           |                     | HRT, PANC, PLCNT, SPLN                                                                      |                                                        |       |                |                       |                               |
| rs9268833 | 1.77E-13            | ESC, LNG, FAT, BRST, BLD, STRM, SKIN, BRN, GI, ADRL, KID, MUS, THYM, HRT, PANC, PLCNT, SPLN | ESDR, BRST, BLD, SKIN, FAT, GI, MUS, PLCNT, PANC, SPLN |       |                |                       | 1f                            |
| rs9268835 | 1.72E-13            | ESC, FAT, BRST, BLD, STRM, SKIN, BRN, GI, ADRL, KID, MUS, THYM, HRT, PANC, PLCNT, SPLN, LNG | ESDR, BRST, BLD, SKIN, FAT, GI, MUS, PLCNT, PANC, SPLN |       |                | ERalpha-a, Esr2, RXRA | 1f                            |
| rs6903608 | 9.67E-11            | FAT, BRST, BLD, SKIN, BRN, GI, ADRL, MUS, THYM, PANC, PLCNT, HRT, SPLN, LNG                 | ESDR, BRST, BLD, SKIN, FAT, GI, SPLN                   |       |                | CTCF, EBF, SMC3, Smad | 1f                            |

| SNP       | Association p value | Promoter histone marks      | Enhancer histone marks              | DNase                   | Proteins bound | Motifs changed                                                                   | RegulomeDB score <sup>a</sup> |
|-----------|---------------------|-----------------------------|-------------------------------------|-------------------------|----------------|----------------------------------------------------------------------------------|-------------------------------|
| rs9268864 | 5.08E-15            | BRN, PLCNT, BLD             | ESDR, ESC, IPSC, BLD                |                         |                | Cdx, DMRT2, DMRT3, Hbp1, Isl2, Lhx3, Pou1f1, Pou3f2, Pou3f4, Pou4f3, Sox, Zfp187 | 2b                            |
| rs9268880 | 2.16E-10            | PLCNT, BLD                  |                                     |                         |                | Foxa, Foxj1, Foxk1, Foxo, GR, HDAC2, Nanog, Sox, p300                            | 1f                            |
| rs9405040 | NA                  | BLD, FAT, BRN, GI           | BLD                                 | BLD                     |                |                                                                                  | 1f                            |
| rs9269070 | NA                  | ESC, BLD, FAT, BRN, HRT, GI | BLD, FAT, GI, SPLN                  | BLD                     |                | CDP, Fox, Foxa, Foxf2, Foxj1, Pou3f3                                             | 1f                            |
| rs9269078 | 7.05E-09            | ESC, BLD, FAT, BRN, HRT, GI | IPSC, BLD, FAT, BRN, GI, SPLN       | BLD, BLD, BLD, BLD, BLD |                | Maf, Myf, Pax-4                                                                  | 1c                            |
| rs9269079 | 6.77E-09            | ESC, BLD, FAT, BRN, HRT, GI | IPSC, BLD, FAT, BRN, GI, THYM, SPLN | BLD, BLD, BLD, BLD, BLD |                | CEBPA, CEBPB, EWSR1-FLI1, Pou2f2, STAT, p300                                     | 2b                            |

| SNP        | Association p value | Promoter histone marks      | Enhancer histone marks                                   | DNase                                                                                                         | Proteins bound                                  | Motifs changed          | RegulomeDB score <sup>a</sup> |
|------------|---------------------|-----------------------------|----------------------------------------------------------|---------------------------------------------------------------------------------------------------------------|-------------------------------------------------|-------------------------|-------------------------------|
| rs9269080  | 9.88E-09            | ESC, BLD, FAT, BRN, HRT, GI | IPSC, BLD, FAT, BRN, GI, THYM, SPLN                      | BLD,BLD,BLD,BLD,BLD                                                                                           |                                                 | E2F, Evi-1, HDAC2       | 1b                            |
| rs9269081  | 3.62E-10            | ESC, BLD, FAT, BRN, HRT, GI | ESDR, ESC, IPSC, BLD, FAT, BRN, GI, THYM, SPLN           | BLD,BLD,BLD,BLD,BLD                                                                                           |                                                 | CIZ, DMRT7, Mef2        | 1d                            |
| rs9269084  | 1.55E-08            | ESC, BLD, FAT, BRN, GI, HRT | ESC, ESDR, IPSC, BLD, FAT, BRN, GI, THYM, LNG, HRT, SPLN | ESC,BLD,BLD,BLD,BLD                                                                                           | ELF1,OCT2,POL2,POL24H8,POU2F2,TBP               | Ets, Gm397              | 2b                            |
| rs12215313 | 1.22E-15            | ESC, BLD, FAT, BRN, GI, HRT | ESC, ESDR, IPSC, BLD, FAT, BRN, GI, THYM, LNG, HRT, SPLN | ESC,ESDR,ESC,IPSC,BLD,BLD,BLD,BLD,BLD,BLD,BLD,SKIN,GI,THYM,PANC,GI,BLD,BLD,BLD                                | EGR1,ELF1,OCT2,POL2,POL24H8,POU2F2,TAF1,TBP,PU1 | EBF, Hsf                | 2b                            |
| rs7755212  | NA                  | ESC, BLD, FAT, BRN, HRT, GI | ESDR, ESC, IPSC, BLD, FAT, BRN, GI, THYM, HRT, SPLN      | ESC,ESDR,ESDR,ESC,IPSC,IPSC,BLD,BLD,BLD,BLD,BLD,BLD,BLD,SKIN,HRT,GI,KID,MUS,THYM,PANC,GI,BLD,MUS,BLD,BLD,SKIN | EGR1,ELF1,POL2,POL24H8,RFX5,TAF1,PU1,CFOS       | AP-1,FXR,PU.1,STAT, VDR | 1b                            |



| SNP        | Association p value | Promoter histone marks      | Enhancer histone marks                              | DNase                                                                                             | Proteins bound                            | Motifs changed              | RegulomeDB score <sup>a</sup> |
|------------|---------------------|-----------------------------|-----------------------------------------------------|---------------------------------------------------------------------------------------------------|-------------------------------------------|-----------------------------|-------------------------------|
| rs7773182  | NA                  | ESC, BLD, FAT, BRN, HRT, GI | ESDR, ESC, IPSC, BLD, FAT, BRN, GI, THYM, HRT, SPLN | ESC,ESDR,ESDR,ESC,IPSC,IPSC, BLD,BLD,BLD,BLD,BLD,BLD,BL D,GI,KID,MUS,THYM,GI,BLD,MUS,BLD,BLD,SKIN | EGR1,ELF1,POL2,POL24H8,RFX5,TAF1,PU1,CFOS | CEBPA,CEBPB                 | 2a                            |
| rs7739203  | NA                  | ESC, BLD, FAT, BRN, HRT, GI | ESDR, ESC, IPSC, BLD, FAT, BRN, GI, THYM, HRT, SPLN | ESC,IPSC,BLD,BLD,BLD,BLD,BLD,MUS,THYM,GI,BLD,BLD                                                  | RFX5,TBP,CFO S                            | Hoxa5,Ncx,Nkx2,TCF4,Zfp187  | 1f                            |
| rs28895247 | 7.37E-17            | GI                          | BLD                                                 |                                                                                                   | CTCF                                      | GR, HNF4, PPAR, Sin3Ak-20   | 2b                            |
| rs9405112  | 9.71E-16            | BRN, HRT, GI                | GI                                                  |                                                                                                   | CTCF                                      | Pou2f2                      | 1f                            |
| rs9378212  | 3.71E-17            | BRN, HRT                    | GI                                                  | ESDR                                                                                              | CTCF                                      | HDAC2, Mef2, SRF, Sox, TATA | 1b                            |
| rs5020946  | 6.83E-14            | BLD                         | BLD, LNG                                            | BLD                                                                                               |                                           | AP-2, STAT                  | 1f                            |

| SNP        | Association p value | Promoter histone marks                                            | Enhancer histone marks              | DNase                       | Proteins bound     | Motifs changed                                       | RegulomeDB score <sup>a</sup> |
|------------|---------------------|-------------------------------------------------------------------|-------------------------------------|-----------------------------|--------------------|------------------------------------------------------|-------------------------------|
| rs12191360 | 4.61E-09            | BLD                                                               | BLD, SPLN                           |                             |                    | Hoxa10, Hoxa9, Hoxb13, Hoxb9, Hoxd10, Pou6f1, Zfp105 | 1f                            |
| rs28366212 | 4.21E-14            | ESDR, ESC, FAT, BLD, LIV, BRN, GI, KID, THYM, HRT, LNG, MUS, SPLN | ESC, ESDR, IPSC, FAT, BLD, GI, THYM | BLD,BLD,BLD,BLD,BLD         | POL24H8            | Foxa, Maf, PU.1, SRF, STAT, TFIIA, p300              | 2b                            |
| rs28366213 | 4.21E-14            | ESDR, ESC, FAT, BLD, LIV, BRN, GI, KID, THYM, HRT, LNG, MUS, SPLN | ESC, ESDR, IPSC, FAT, BLD, GI, THYM | BLD,BLD,BLD,BLD,BLD         | POL24H8            | SRF, TATA, TFIIA, YY1                                | 2b                            |
| rs28366298 | 1.83E-15            | ESDR                                                              | ESDR, BLD                           |                             |                    |                                                      | 1f                            |
| rs9270911  | 2.21E-09            | FAT, BLD, BRN, GI, MUS, HRT                                       | FAT, BLD, LIV, BRN, GI              | BLD,BLD,BLD,BLD,BLD,BLD,BLD | NFKB,POL2, TAF1    | Pou5f1                                               | 1f                            |
| rs586610   | 2.70E-07            | FAT, BLD, BRN, GI, MUS, HRT                                       | FAT, BLD, LIV, BRN, GI              | BLD,BLD,BLD,BLD,BLD,BLD,BLD | NFKB,TBP,POL2,TAF1 | EWSR1-FLI1                                           | 1f                            |

| SNP       | Association p value | Promoter histone marks | Enhancer histone marks              | DNase                                                         | Proteins bound          | Motifs changed                                 | RegulomeDB score <sup>a</sup> |
|-----------|---------------------|------------------------|-------------------------------------|---------------------------------------------------------------|-------------------------|------------------------------------------------|-------------------------------|
| rs9270923 | 2.11E-10            | BLD, FAT, BRN, GI, HRT | FAT, BLD, LIV, BRN, GI, PANC        | BRST,BLD,BLD, BLD,BLD,BLD,B LD,BLD,MUS,M US,BLD,MUS,BL D      | NFKB,POL2,R FX5,TBP     | CIZ, ELF1, Ik-2, NF-AT, STAT                   | 2b                            |
| rs9270924 | 3.24E-09            | BLD, FAT, BRN, GI, HRT | FAT, BLD, LIV, BRN, GI, PANC        | BRST,BLD,BLD, BLD,BLD,BLD,B LD,BLD,MUS,M US,BLD,MUS,BL D      | NFKB,POL2,R FX5,TBP     | CDP, ELF1, Ik-2, Mef2, NF-AT, NF-Y, RFX5, STAT | 2b                            |
| rs9270925 | 3.24E-09            | BLD, FAT, BRN, GI, HRT | FAT, BLD, LIV, BRN, GI, PANC        | BRST,BLD,BLD, BLD,BLD,BLD,B LD,BLD,SKIN,M US,MUS,BLD,M US,BLD | POL2,RFX5,SR F,TBP,NFKB | Irf, Osf2                                      | 2b                            |
| rs9270926 | 3.24E-09            | BLD, FAT, BRN, GI, HRT | FAT, BLD, LIV, BRN, GI, PANC        | BRST,BLD,BLD, BLD,BLD,BLD,B LD,BLD,SKIN,M US,MUS,BLD,M US,BLD | POL2,RFX5,SR F,TBP,NFKB | Foxp3, GATA, Irf, Osf2                         | 2b                            |
| rs9271055 | 7.67E-10            | GI, BLD                | BLD, FAT, HRT                       | BLD,BLD,BLD,B LD,BLD                                          | BATF,EGR1,N FKB         | COMP1, Ets, Nanog, p300                        | 1d                            |
| rs9271100 | 1.15E-08            | BLD, GI                | ESC, IPSC, BLD, FAT, BRN, PLCNT, GI | BLD                                                           | CTCF                    |                                                | 1f                            |

| SNP       | Association p value | Promoter histone marks                                                    | Enhancer histone marks                                                                        | DNase                                                                                                                                                                                                | Proteins bound                                                                                | Motifs changed                           | RegulomeDB score <sup>a</sup> |
|-----------|---------------------|---------------------------------------------------------------------------|-----------------------------------------------------------------------------------------------|------------------------------------------------------------------------------------------------------------------------------------------------------------------------------------------------------|-----------------------------------------------------------------------------------------------|------------------------------------------|-------------------------------|
| rs9271155 | 3.52E-11            | ESC, ESDR, IPSC, FAT, STRM, BRST, BLD, SKIN, BRN, GI, KID, HRT, MUS, BONE | ESC, ESDR, IPSC, FAT, BRST, BLD, SKIN, BRN, GI, ADRL, KID, PANC, THYM, PLCNT, MUS, CRVX, BONE | ESDR,ESDR,ESC, BRST,BLD,BLD, BLD,BLD,BLD,B LD,BLD,SKIN,S KIN,GI,KID,THY M,BLD,CRVX,B RST,MUS,BLD,S KIN                                                                                               | NFKB,EBF1,OC T2,POL2,POU 2F2,TAF1,POL 24H8,RFX5,ST AT1,GATA1                                  | AP-2, BCL, Evi-1, Gcm1, INSM1, Pbx3, YY1 | 2b                            |
| rs9271156 | 9.25E-09            | ESC, ESDR, IPSC, FAT, STRM, BRST, BLD, SKIN, BRN, GI, KID, HRT, MUS, BONE | ESC, ESDR, IPSC, FAT, BRST, BLD, SKIN, BRN, GI, ADRL, KID, PANC, THYM, PLCNT, MUS, CRVX, BONE | ESDR,ESDR,ESC, BRST,BLD,BLD, BLD,BLD,BLD,B LD,BLD,SKIN,S KIN,GI,KID,THY M,BLD,CRVX,B RST,MUS,BLD,S KIN                                                                                               | NFKB,EBF1,OC T2,POL2,POU 2F2,SP1,TAF1, POL24H8,RFX 5,STAT1,GAT A1                             | AP-2, BCL, Gcm1, INSM1, Pbx3, YY1        | 2b                            |
| rs9271159 | 4.32E-10            | ESC, ESDR, IPSC, FAT, STRM, BRST, BLD, SKIN, BRN, GI, KID, HRT, MUS, BONE | ESC, ESDR, IPSC, FAT, BRST, BLD, SKIN, BRN, GI, ADRL, KID, PANC, THYM, PLCNT, MUS, CRVX, BONE | ESC,ESDR,ESDR, ESDR,ESDR,ES C,IPSC,BRST,BL D,BLD,BLD,BLD, BLD,BLD,BLD,S KIN,SKIN,SKIN, SKIN,BRN,GI,KI D,LNG,MUS,MU S,PLCNT,THYM, OVRY,PANC,MU S,GI,BLD,CRVX, BRST,MUS,MUS, VAS,BLD,BLD,B RN,SKIN,LNG | NFKB,CHD2,EB F1,OCT2,POL 2,POU2F2,RFX 5,SP1,TAF1,TB P,POL24H8,ST AT1,USF2,GTF 2F1,GATA1,K AP1 | RFX5, STAT                               | 2b                            |

| SNP       | Association p value | Promoter histone marks                                                    | Enhancer histone marks                                                                        | DNase                                                                                                                                                                                                       | Proteins bound                                                                                   | Motifs changed | RegulomeDB score <sup>a</sup> |
|-----------|---------------------|---------------------------------------------------------------------------|-----------------------------------------------------------------------------------------------|-------------------------------------------------------------------------------------------------------------------------------------------------------------------------------------------------------------|--------------------------------------------------------------------------------------------------|----------------|-------------------------------|
| rs9271160 | 4.10E-10            | ESC, ESDR, IPSC, FAT, STRM, BRST, BLD, SKIN, BRN, GI, KID, HRT, MUS, BONE | ESC, ESDR, IPSC, FAT, BRST, BLD, SKIN, BRN, GI, ADRL, KID, PANC, THYM, PLCNT, MUS, CRVX, BONE | ESC,ESDR,ESDR,ESDR,ESDR,ESDR,ESC,IPSC,BRST,BLD,BLD,BLD,BLD,BLD,BLD,SKIN,SKIN,SKIN,SKIN,SKIN,SKIN,GI,KID,LNG,MUS,MUS,PLCNT,THYM,OVRY,PANC,MUS,GI,BLD,CRVX,BRST,MUS,MUS,VAS,BLD,BLD,BRN,SKIN,LNG              | NFKB,CHD2,EBF1,OCT2,POL2,POU2F2,RFX5,SP1,TAF1,TBP,POL24H8,STAT1,USF2,GTF2F1,GATA1,KAP1           | RFX5, STAT     | 2b                            |
| rs9271161 | 4.10E-10            | ESC, ESDR, IPSC, FAT, STRM, BRST, BLD, SKIN, BRN, GI, KID, HRT, MUS, BONE | ESC, ESDR, IPSC, FAT, BRST, BLD, SKIN, BRN, GI, ADRL, KID, PANC, THYM, PLCNT, MUS, CRVX, BONE | ESC,ESDR,ESDR,ESDR,ESDR,ESDR,ESC,LNG,IPSC,IPSC,BRST,BLD,BLD,BLD,BLD,BLD,SKIN,SKIN,SKIN,ADRL,BRN,BRN,HRT,GI,GI,KID,LNG,MUS,MUS,PLCNT,GI,THYM,GI,OVRY,PANC,MUS,GI,LNG,BLD,CRVX,BRST,MUS,MUS,VAS,BLD,BLD,BRN,S | NFKB,CHD2,EBF1,POL2,RFX5,SP1,TAF1,TBP,YY1,CFOS,CJUN,STAT1,USF2,FOSL1,GTF2F1,NFYA,NFYB,GATA1,KAP1 | STAT           | 2a                            |

| SNP       | Association p value | Promoter histone marks                                                         | Enhancer histone marks                                                                        | DNase                                                                                                                                                                                                                                 | Proteins bound                                                                                        | Motifs changed                                                                                                         | RegulomeDB score <sup>a</sup> |
|-----------|---------------------|--------------------------------------------------------------------------------|-----------------------------------------------------------------------------------------------|---------------------------------------------------------------------------------------------------------------------------------------------------------------------------------------------------------------------------------------|-------------------------------------------------------------------------------------------------------|------------------------------------------------------------------------------------------------------------------------|-------------------------------|
|           |                     |                                                                                |                                                                                               | KIN,SKIN,LNG                                                                                                                                                                                                                          |                                                                                                       |                                                                                                                        |                               |
| rs9271168 | 6.39E-09            | ESC, ESDR, IPSC, FAT, STRM, BRST, BLD, SKIN, BRN, GI, KID, HRT, MUS, LNG, BONE | ESC, ESDR, IPSC, FAT, BRST, BLD, SKIN, BRN, GI, ADRL, KID, PANC, THYM, PLCNT, MUS, CRVX, BONE | ESC,ESDR,ESDR,ESDR,ESDR,ES C,LNG,IPSC,IPSC,BRST,BLD,BL D,BLD,BLD,BLD, BLD,BLD,SKIN, SKIN,SKIN,SKIN, ADRL,BRN,GI,G I,KID,LNG,MUS, MUS,PLCNT,GI, THYM,GI,OVRY, PANC,MUS,GI,L NG,BLD,CRVX, BRST,MUS,MUS, VAS,BLD,BLD,B RN,SKIN,SKIN,L NG | BATF,CHD2,NFKB,RFX5,YY1,CFOS,CJUN,STAT1,USF2,FOSL1,GTF2F1,JUNB,JUND,NFYA,TAL1,STAT3,GATA1,POU2F1,KAP1 | AP-1, AP-2, BATF, Bach1, Bach2, GATA, GR, HMGN3, Irf, KAP1, Maf, Myc, Nkx2, Nkx3, Nrf-2, PRDM1, RXRA, STAT, TCF4, p300 | 2a                            |
| rs9271170 | 6.39E-09            | ESC, ESDR, IPSC, FAT, STRM, BRST, BLD, SKIN, BRN, GI, KID, HRT, MUS, LNG, BONE | ESC, ESDR, IPSC, FAT, BRST, BLD, SKIN, BRN, GI, ADRL, KID, PANC, THYM, PLCNT, MUS, CRVX, BONE | ESC,ESDR,ESDR,ESDR,ESDR,ES C,LNG,IPSC,IPSC,BRST,BLD,BL D,BLD,BLD,BLD, BLD,BLD,SKIN, SKIN,SKIN,SKIN, GI,GI,MUS,GI,G I,PANC,GI,BLD,                                                                                                     | BATF,CHD2,NFKB,RFX5,YY1,CFOS,CJUN,STAT1,FOSL1, JUNB,TAL1,STAT3,GATA1,POU2F1,KAP1                      | Bcl6b, NRSF, STAT, Sp100                                                                                               | 1f                            |

| SNP       | Association p value | Promoter histone marks                                                         | Enhancer histone marks                                                                        | DNase                                                                                                                                                     | Proteins bound                                                                  | Motifs changed                             | RegulomeDB score <sup>a</sup> |
|-----------|---------------------|--------------------------------------------------------------------------------|-----------------------------------------------------------------------------------------------|-----------------------------------------------------------------------------------------------------------------------------------------------------------|---------------------------------------------------------------------------------|--------------------------------------------|-------------------------------|
|           |                     |                                                                                |                                                                                               | CRVX,BRST,MUS,MUS,BLD,BLD,BRN,SKIN,SKIN,LNG                                                                                                               |                                                                                 |                                            |                               |
| rs9271171 | NA                  | ESC, ESDR, IPSC, FAT, STRM, BRST, BLD, SKIN, BRN, GI, KID, HRT, MUS, LNG, BONE | ESC, ESDR, IPSC, FAT, BRST, BLD, SKIN, BRN, GI, ADRL, KID, PANC, THYM, PLCNT, MUS, CRVX, BONE | ESC,ESDR,ESDR,ESDR,ESDR,ES C,IPSC,IPSC,BRS T,BLD,BLD,BLD, BLD,BLD,BLD,B LD,SKIN,SKIN,G I,GI,MUS,GI,GI, BLD,CRVX,BRST, MUS,MUS,BLD, BLD,BRN,SKIN, SKIN,LNG | BATF,CHD2,EBF1,RFX5,YY1,POL2,NFKB,C FOS,CJUN,FOS L1,JUNB,TAL1,STAT3,GATA 1,KAP1 | Dobox4,Lmo2-complex,SIX5                   | 2b                            |
| rs9271199 | 1.61E-08            | ESC, ESDR, IPSC, BLD, BRN, GI                                                  | ESC, IPSC, BRST, BLD, SKIN, GI, KID, PANC, THYM                                               | BLD,BLD                                                                                                                                                   | BATF,MEF2A, MEF2C                                                               | HNF1, Ncx                                  | 2b                            |
| rs7451962 | 3.25E-07            | ESDR                                                                           | ESC, ESDR, IPSC, BLD, THYM, PANC, HRT                                                         | ESDR                                                                                                                                                      |                                                                                 |                                            | 1f                            |
| rs9271331 | 3.25E-07            | ESDR, GI                                                                       | ESC, ESDR, IPSC, BLD, THYM, PANC                                                              | ESDR,IPSC                                                                                                                                                 |                                                                                 | BDP1,Irf,Klf4,Klf7,SP1,Sp4,TATA, UF1H3BETA | 2b                            |

| SNP         | Association p value | Promoter histone marks | Enhancer histone marks                          | DNase                                                                | Proteins bound                                                | Motifs changed                                                                                             | RegulomeDB score <sup>a</sup> |
|-------------|---------------------|------------------------|-------------------------------------------------|----------------------------------------------------------------------|---------------------------------------------------------------|------------------------------------------------------------------------------------------------------------|-------------------------------|
| rs9271488   | 2.76E-13            | BLD                    | BLD                                             |                                                                      |                                                               |                                                                                                            | 1f                            |
| rs200688486 | NA                  | BLD                    | BLD                                             |                                                                      |                                                               | STAT                                                                                                       | 1f                            |
| rs9271511   | 4.37E-13            | BLD                    | BLD, SKIN, GI, THYM, SPLN                       |                                                                      | POL2,POL24H8 ,TBP                                             | Arid3a, Dbx1, Foxj1, HNF1, Hoxa10, Hoxd10, Hoxd8, Nanog, Ncx, Nkx6-1, Pou2f2, Pou3f2, Pou3f3, TATA, Zfp187 | 2c                            |
| rs9271540   | 3.43E-13            | BLD, GI, BRN           | ESC, IPSC, BRST, BLD, SKIN, FAT, GI, THYM, SPLN | BLD,BLD,BLD                                                          |                                                               | Arid5a, Cdx2, Foxj2, Rhox11                                                                                | 2b                            |
| rs9271549   | 4.37E-13            | BLD, GI, BRN           | ESC, IPSC, BRST, BLD, SKIN, FAT, GI, THYM, SPLN | BLD,BLD,BLD,BLD,BLD,BLD                                              | POL2,CTCF,ZNF263                                              | AP-1, CHX10, DBP, Gfi1, PLZF                                                                               | 2b                            |
| rs9271567   | 9.59E-10            | BLD, GI, BRN           | ESC, IPSC, BRST, BLD, SKIN, FAT, GI, THYM, SPLN | ESC,ESDR,ESDR,ESDR,ESDR,ESC,IPSC,IPSC,BRST,BLD,BLD,BLD,BLD,BLD,BLD,B | CTCF,ELF1,OC T2,PAX5C20,PAX5N19,POL2, POL24H8,POU2F2,RAD21,RF |                                                                                                            | 1f                            |



| SNP       | Association p value | Promoter histone marks | Enhancer histone marks                          | DNase                                                                                                                      | Proteins bound                                                                                           | Motifs changed               | RegulomeDB score <sup>a</sup> |
|-----------|---------------------|------------------------|-------------------------------------------------|----------------------------------------------------------------------------------------------------------------------------|----------------------------------------------------------------------------------------------------------|------------------------------|-------------------------------|
|           |                     |                        |                                                 | LD,SKIN,SKIN,BRN,KID,MUS,GI,THYM,MUS,GI,BLD,MUS,BLD,SKIN,SKIN                                                              | X5,SIX5,SMC3,TBP,YY1,NFKB,TAF1,NANOG,ZNF263                                                              |                              |                               |
| rs9271568 | 1.36E-13            | BLD, GI, BRN           | ESC, IPSC, BRST, BLD, SKIN, FAT, GI, THYM, SPLN | ESC,ESDR,ESDR,ESDR,ESDR,ESC,IPSC,IPSC,BRST,BLD,BLD,BLD,BLD,BLD,BLD,BLD,SKIN,SKIN,BRN,KID,MUS,THYM,MUS,GI,BLD,BLD,SKIN,SKIN | CTCF,ELF1,OC T2,PAX5C20,PAX5N19,POL2,POL24H8,POU2F2,RAD21,RF X5,SIX5,SMC3,TBP,YY1,NFKB,TAF1,NANOG,ZNF263 | Nkx2, Zfp691                 | 1f                            |
| rs9271574 | 4.52E-13            | BLD, GI, BRN           | ESC, IPSC, BRST, BLD, SKIN, FAT, GI, THYM, SPLN | BLD,BLD,BLD,BLD,BLD,THYM,BLD,BLD                                                                                           | OCT2,PAX5C20,PAX5N19,POL24H8,POU2F2,PU1,SIX5,TBP,POL2,TAF1,NFKB,ZNF263                                   |                              | 1f                            |
| rs9271583 | 8.21E-12            | BLD, GI, BRN, SKIN     | ESC, IPSC, BRST, BLD, SKIN, FAT, GI, THYM, SPLN | BRST,BLD,BLD,BLD,BLD,BLD,GI,BLD,BLD                                                                                        | POL2                                                                                                     | Cphx, DMRT7, Dox4, Irf, SIX5 | 2b                            |
| rs2097431 | 9.40E-08            | BLD, GI, BRN, SKIN     | ESC, IPSC, BRST, BLD, SKIN, FAT, GI, THYM, SPLN | BRST,BLD,BLD,BLD,BLD,BLD,SKIN,SKIN,THYM,GI,BLD,BLD                                                                         | MEF2C,NFKB,POL2                                                                                          |                              | 1f                            |

| SNP       | Association p value | Promoter histone marks | Enhancer histone marks                          | DNase                                                                                            | Proteins bound                                       | Motifs changed                               | RegulomeDB score <sup>a</sup> |
|-----------|---------------------|------------------------|-------------------------------------------------|--------------------------------------------------------------------------------------------------|------------------------------------------------------|----------------------------------------------|-------------------------------|
| rs9271586 | 1.75E-14            | BLD, GI, BRN, SKIN     | ESC, IPSC, BRST, BLD, SKIN, FAT, GI, THYM, SPLN | BRST,BLD,BLD, BLD,BLD,BLD,B LD,BLD,SKIN,S KIN,GI,THYM,M US,GI,BLD,BRST ,MUS,BLD                  | BCL11A,MEF2 A,MEF2C,NFK B,SP1,TBP,OC T2,POL2,POU2 F2 |                                              | 1f                            |
| rs9271588 | 1.57E-14            | BLD, GI, BRN, SKIN     | ESC, IPSC, BRST, BLD, SKIN, FAT, GI, THYM, SPLN | ESDR,BRST,BLD ,BLD,BLD,BLD, BLD,BLD,BLD,S KIN,SKIN,SKIN, MUS,THYM,MU S,GI,BLD,BRST, MUS,BLD,SKIN | BCL11A,MEF2 A,MEF2C,NFK B,OCT2,POU2F 2,RFX5,SP1,TB P | Cdx2, Pdx1                                   | 1b                            |
| rs9271589 | 4.56E-13            | BLD, GI                | ESC, IPSC, BRST, BLD, SKIN, FAT, GI, THYM, SPLN | BRST,BLD,BLD, BLD,BLD,BLD,B LD,BLD,GI,BLD, BLD                                                   | NFKB,RFX5,T BP                                       | CACD, FXR, SF1, Zec                          | 1b                            |
| rs9271590 | 1.78E-14            | BLD, GI                | ESC, IPSC, BRST, BLD, SKIN, FAT, GI, THYM, SPLN | BLD,BLD,BLD,B LD,BLD,BLD,BL D,GI,BLD,BLD                                                         | NFKB,RFX5,T BP                                       | CACD, CTCFL, INSM1, Myc, NF-kappaB           | 2b                            |
| rs9271591 | 1.84E-14            | BLD, GI                | ESC, IPSC, BRST, BLD, SKIN, FAT, GI, THYM, SPLN | BLD,BLD,BLD,B LD,BLD,BLD,BL D,GI,BLD,BLD                                                         | NFKB,RFX5,T BP                                       | CACD, CTCFL, INSM1, NF-kappaB, Pou2f2, Rad21 | 1b                            |
| rs3129765 | 1.30E-10            | BLD, GI                | ESC, IPSC, BRST, BLD, SKIN, FAT, GI, THYM, SPLN | BLD,BLD                                                                                          | TBP                                                  | TATA                                         | 2c                            |

| SNP       | Association p value | Promoter histone marks  | Enhancer histone marks                          | DNase                       | Proteins bound    | Motifs changed                             | RegulomeDB score <sup>a</sup> |
|-----------|---------------------|-------------------------|-------------------------------------------------|-----------------------------|-------------------|--------------------------------------------|-------------------------------|
| rs9271605 | 3.02E-13            | BLD, GI                 | ESC, IPSC, BRST, BLD, SKIN, FAT, GI, THYM, SPLN | BLD,BLD,BLD                 | RFX5,TBP          | CEBPA, CEBPB, CEBPD, Smad, Zfp105          | 1d                            |
| rs9271687 | 2.18E-11            | BLD                     | BLD, THYM, GI                                   | BLD,BLD,BLD,BLD             | EBF1              |                                            | 2c                            |
| rs9271775 | 5.00E-12            | BLD                     | BLD, THYM                                       |                             |                   |                                            | 1f                            |
| rs3129768 | 1.47E-10            | BLD                     | FAT, BLD                                        | BLD                         | EBF1,POL2         |                                            | 1f                            |
| rs3104369 | 4.23E-09            | BLD, MUS, GI            | ESC, BLD, SPLN, BRST                            | BLD,BLD,BLD                 |                   | Pou2f2                                     | 1f                            |
| rs9272346 | 8.25E-08            | ESC, BLD, GI, MUS, SPLN | ESC, ESDR, IPSC, BRST, BLD, VAS, LNG            | BLD,BLD                     |                   | ERalpha-a,Esr2,Foxj2,HNF4,Klf7, LF-A1,RXRA | 1b                            |
| rs9272410 | 5.22E-11            | BLD, GI, HRT, MUS, SPLN | ESC, ESDR, IPSC, BLD, VAS, GI, LNG, SPLN        | ESC,BLD,BLD,BLD,BLD,BLD,BLD | NFKB,POL24H8,RFX5 | Hoxa9, Hoxb9, Hoxc9, Pdx1                  | 2b                            |

| SNP        | Association p value | Promoter histone marks                       | Enhancer histone marks                        | DNase                                                                        | Proteins bound                    | Motifs changed                      | RegulomeDB score <sup>a</sup> |
|------------|---------------------|----------------------------------------------|-----------------------------------------------|------------------------------------------------------------------------------|-----------------------------------|-------------------------------------|-------------------------------|
| rs9272416  | 8.75E-08            | BLD, GI, HRT, LNG, MUS, THYM, SPLN           | ESC, ESDR, IPSC, BLD, VAS, GI, LNG, SPLN      | ESC,BRST,BLD, BLD,BLD,BLD,B LD,BLD,BLD,TH YM,PANC,BLD, BLD                   | NFKB,POL24H 8,RFX5,TBP            | ERalpha-a,Hic1,R XRA,SP1            | 2a                            |
| rs9272420  | 1.90E-13            | BLD, FAT, BRN, GI, HRT, LNG, MUS, THYM, SPLN | ESC, ESDR, IPSC, BLD, VAS, GI, LNG, MUS, SPLN | ESC,BRST,BLD, BLD,BLD,BLD,B LD,BLD,BLD,GI, THYM,OVRY,PA NC,MUS,BLD,C RVX,BLD | NFKB,ELF1,PO L2,POL24H8,R FX5,TBP | Dobox4, HMG-IY, Myc, NF-kappaB      | 2b                            |
| rs9272491  | 1.01E-07            | BLD, FAT, LIV, BRN, GI, THYM, HRT, LNG, SPLN | BLD, GI, LNG, MUS                             |                                                                              |                                   | Dobox4,Hltf,Mef 2,Pou2f2,SIX5       | 2b                            |
| rs9272492  | NA                  | BLD, FAT, LIV, BRN, GI, THYM, HRT, LNG, SPLN | BLD, GI, LNG, MUS                             |                                                                              |                                   | Mef2,Pou2f2                         | 2b                            |
| rs9272494  | 1.13E-07            | BLD, FAT, LIV, BRN, GI, THYM, HRT, LNG, SPLN | BLD, GI, LNG, MUS                             |                                                                              |                                   | CEBPB,Gfi1,Lhx 3,Pax-4,Pou3f2, T EF | 2b                            |
| rs41269945 | 1.03E-08            | BLD, FAT, LIV, BRN, GI, THYM, HRT            | BLD, GI, LNG, HRT, SPLN                       |                                                                              |                                   | HMG-IY, Lhx3                        | 2b                            |

| SNP        | Association p value | Promoter histone marks            | Enhancer histone marks                | DNase           | Proteins bound           | Motifs changed          | RegulomeDB score <sup>a</sup> |
|------------|---------------------|-----------------------------------|---------------------------------------|-----------------|--------------------------|-------------------------|-------------------------------|
| rs9272614  | 3.64E-09            | BLD, FAT, LIV, BRN, GI, THYM, HRT | BLD, GI, LNG, HRT, SPLN               |                 |                          | AP-1, HMG-IY, Irf, STAT | 2b                            |
| rs17426593 | 1.17E-07            | BLD, FAT, LIV, BRN, GI, THYM      | BLD, LNG, HRT, SPLN                   | BLD,BLD         | POL2,POL24H8             | AP-1,Lhx4,NF-Y, RFX5    | 1f                            |
| rs9272723  | NA                  | BLD, FAT, GI                      | BLD, GI, HRT, LNG, SPLN               |                 |                          | Barx1,Cdx2,EBF          | 1f                            |
| rs9273363  | 4.51E-11            | ESDR, ESC, BLD                    | ESC, ESDR, IPSC, BLD, LNG, PANC, SPLN | BLD,BLD         | POL24H8                  | ATF2, E4BP4, Hsf, LXR   | 1d                            |
| rs1063355  | 1.19E-06            | BLD                               | ESC, ESDR, BRST, BLD                  | BLD,BLD,BLD,BLD | EBF1,ELF1,TBP,TCF12      | AIRE,HNF1,Nanog         | 1d                            |
| rs1770     | 3.21E-15            | BLD                               | ESC, ESDR, BRST, BLD, THYM, HRT, SPLN | BLD,GI,BLD      | EBF1,ELF1,POL2,TBP,TCF12 | Ets, NRSF, Nrf-2        | 1f                            |
| rs1063349  | 2.57E-06            | BLD                               | ESC, ESDR, BRST, BLD, THYM, HRT, SPLN | BLD,BLD,BLD,BLD | ELF1,POL2,POL24H8        | HNF4,TCF4               | 2b                            |

| SNP        | Association p value | Promoter histone marks             | Enhancer histone marks                                                     | DNase           | Proteins bound | Motifs changed                                               | RegulomeDB score <sup>a</sup> |
|------------|---------------------|------------------------------------|----------------------------------------------------------------------------|-----------------|----------------|--------------------------------------------------------------|-------------------------------|
| rs2647025  | 4.30E-13            | ESC, BRST, BLD, BRN, GI, THYM, LNG | ESC, IPSC, BRST, BLD, FAT, GI, THYM, HRT, LNG, PANC, MUS, SPLN, CRVX, SKIN | BLD,BLD,BLD     | POL2           |                                                              | 1f                            |
| rs3828796  | 3.37E-08            | ESC, BRST, BLD, BRN, GI, THYM, LNG | ESC, IPSC, BRST, BLD, FAT, GI, THYM, HRT, LNG, PANC, MUS, SPLN, CRVX, SKIN | BLD,BLD,BLD,BLD | POL2,POL24H8   | AP-1, ERalpha-a, Esr2, FXR, LXR, RXRA                        | 1f                            |
| rs17205563 | NA                  | BLD, GI                            | IPSC, BRST, BLD, FAT, GI, THYM, HRT, LNG, MUS, SPLN                        | BLD             | POL2,POL24H8   | ATF3,Myc,SIRT6 ,SREBP,ZEB1                                   | 2b                            |
| rs73410789 | 1.76E-08            | BRN                                | ESC, IPSC, FAT, STRM, BRST, BLD, SKIN, BRN, THYM, GI, MUS                  | SKIN            | CTCF,SMC3      | RFX5                                                         | 2b                            |
| rs762808   | 2.79E-08            | SKIN                               | IPSC, BLD                                                                  |                 | ZNF263         | CACD, CCNT2, Klf4, Klf7, MAZR, MZF1::1-4, Pax-4, SREBP, TATA | 2b                            |

Data are shown for demonstrating evidence of histone marks, DNase hypersensitivity sites or transcription factor occupancy of the GWS SNPs

using HaploReg v4.1. <sup>a</sup>the RegulomeDB score represent: 1a, eQTL + TF binding + matched TF motif + matched DNase Footprint + DNase peak; 1b, eQTL + TF binding + any motif + DNase Footprint + DNase peak; 1c, eQTL + TF binding + matched TF motif + DNase peak; 1d, eQTL + TF binding + any motif + DNase peak; 1e, eQTL + TF binding + matched TF motif; 1f, eQTL + TF binding / DNase peak; 2a, TF binding + matched TF motif + matched DNase Footprint + DNase peak; 2b, TF binding + any motif + DNase Footprint + DNase peak; 2c, TF binding + matched TF motif + DNase peak

**Table S4.** EQTL analysis for rs9268832 and rs3115628 from the GTEx2015\_v6 study

| SNP       | Correlated gene          | p-value  | Tissue                              |
|-----------|--------------------------|----------|-------------------------------------|
| rs9268832 | <i>HLA-DRB6</i>          | 4.88E-37 | Muscle_Skeletal                     |
| rs9268832 | <i>HLA-DRB6</i>          | 5.78E-37 | Whole_Blood                         |
| rs9268832 | <i>HLA-DRB6</i>          | 9.02E-34 | Lung                                |
| rs9268832 | <i>HLA-DRB6</i>          | 5.39E-33 | Adipose_Subcutaneous                |
| rs9268832 | <i>HLA-DRB6</i>          | 1.91E-31 | Artery_Tibial                       |
| rs9268832 | <i>HLA-DRB6</i>          | 2.49E-28 | Thyroid                             |
| rs9268832 | <i>HLA-DRB6</i>          | 2.60E-28 | Skin_Sun_Exposed_Lower_leg          |
| rs9268832 | <i>HLA-DRB6</i>          | 4.27E-28 | Nerve_Tibial                        |
| rs9268832 | <i>HLA-DRB6</i>          | 7.06E-21 | Skin_Not_Sun_Exposed_Suprapubic     |
| rs9268832 | <i>HLA-DRB6</i>          | 1.14E-20 | Heart_Left_Ventricle                |
| rs9268832 | <i>HLA-DRB6</i>          | 2.07E-20 | Esophagus_Muscularis                |
| rs9268832 | <i>HLA-DRB6</i>          | 4.59E-20 | Artery_Aorta                        |
| rs9268832 | <i>HLA-DRB6</i>          | 1.23E-19 | Esophagus_Mucosa                    |
| rs9268832 | <i>HLA-DQA2</i>          | 1.57E-19 | Whole_Blood                         |
| rs9268832 | <i>HLA-DRB6</i>          | 1.57E-17 | Testis                              |
| rs9268832 | <i>HLA-DRB6</i>          | 1.66E-17 | Breast_Mammary_Tissue               |
| rs9268832 | <i>HLA-DRB1</i>          | 1.27E-16 | Whole_Blood                         |
| rs9268832 | <i>HLA-DRB6</i>          | 2.23E-16 | Stomach                             |
| rs9268832 | <i>HLA-DRB6</i>          | 3.60E-16 | Adipose_Visceral_Omentum            |
| rs9268832 | <i>HLA-DRB6</i>          | 6.63E-15 | Colon_Transverse                    |
| rs9268832 | <i>HLA-DQB1</i>          | 1.11E-14 | Whole_Blood                         |
| rs9268832 | <i>HLA-DRB6</i>          | 1.61E-14 | Heart_Atrial_Appendage              |
| rs9268832 | <i>HLA-DQA2</i>          | 2.25E-14 | Muscle_Skeletal                     |
| rs9268832 | <i>HLA-DQB1</i>          | 2.37E-14 | Artery_Tibial                       |
| rs9268832 | <i>HLA-DRB6</i>          | 4.52E-14 | Esophagus_Gastroesophageal_Junction |
| rs9268832 | <i>HLA-DRB6</i>          | 1.09E-13 | Cells_EBV-transformed_lymphocytes   |
| rs9268832 | <i>HLA-DQA2</i>          | 2.09E-13 | Adipose_Subcutaneous                |
| rs9268832 | <i>XXbac-BPG254F23.6</i> | 4.26E-13 | Whole_Blood                         |
| rs9268832 | <i>XXbac-BPG254F23.6</i> | 7.15E-13 | Skin_Sun_Exposed_Lower_leg          |
| rs9268832 | <i>HLA-DRB6</i>          | 8.30E-13 | Adrenal_Gland                       |
| rs9268832 | <i>HLA-DRB6</i>          | 8.75E-13 | Pancreas                            |
| rs9268832 | <i>HLA-DRB6</i>          | 3.01E-12 | Prostate                            |
| rs9268832 | <i>HLA-DRB6</i>          | 3.86E-12 | Artery_Coronary                     |
| rs9268832 | <i>HLA-DRB6</i>          | 5.14E-12 | Small_Intestine_Terminal_Ileum      |
| rs9268832 | <i>HLA-DQB1</i>          | 5.91E-12 | Skin_Sun_Exposed_Lower_leg          |
| rs9268832 | <i>HLA-DRB6</i>          | 7.95E-12 | Colon_Sigmoid                       |
| rs9268832 | <i>XXbac-BPG254F23.6</i> | 8.64E-12 | Nerve_Tibial                        |
| rs9268832 | <i>HLA-DQB1</i>          | 1.16E-11 | Muscle_Skeletal                     |
| rs9268832 | <i>HLA-DQB1</i>          | 1.56E-11 | Lung                                |
| rs9268832 | <i>HLA-DQA2</i>          | 2.76E-11 | Artery_Tibial                       |
| rs9268832 | <i>HLA-DRB1</i>          | 3.33E-11 | Lung                                |
| rs9268832 | <i>XXbac-BPG254F23.6</i> | 3.55E-11 | Skin_Not_Sun_Exposed_Suprapubic     |
| rs9268832 | <i>HLA-DQB1</i>          | 3.97E-11 | Adipose_Subcutaneous                |



| SNP       | Correlated gene          | p-value  | Tissue                          |
|-----------|--------------------------|----------|---------------------------------|
| rs9268832 | <i>XXbac-BPG254F23.6</i> | 5.48E-11 | Adipose_Subcutaneous            |
| rs9268832 | <i>HLA-DRB1</i>          | 6.90E-11 | Artery_Tibial                   |
| rs9268832 | <i>HLA-DRB6</i>          | 1.05E-10 | Pituitary                       |
| rs9268832 | <i>XXbac-BPG254F23.6</i> | 1.66E-10 | Lung                            |
| rs9268832 | <i>HLA-DRB1</i>          | 1.73E-10 | Skin_Sun_Exposed_Lower_leg      |
| rs9268832 | <i>XXbac-BPG254F23.6</i> | 2.48E-10 | Thyroid                         |
| rs9268832 | <i>HLA-DRB1</i>          | 3.30E-10 | Muscle_Skeletal                 |
| rs9268832 | <i>HLA-DQA2</i>          | 4.81E-10 | Lung                            |
| rs9268832 | <i>HLA-DRB1</i>          | 7.40E-10 | Esophagus_Mucosa                |
| rs9268832 | <i>XXbac-BPG254F23.6</i> | 8.37E-10 | Breast_Mammary_Tissue           |
| rs9268832 | <i>HLA-DQB1</i>          | 9.80E-10 | Thyroid                         |
| rs9268832 | <i>HLA-DQB1</i>          | 1.01E-09 | Nerve_Tibial                    |
| rs9268832 | <i>HLA-DRB1</i>          | 3.54E-09 | Adipose_Subcutaneous            |
| rs9268832 | <i>HLA-DQB1-AS1</i>      | 4.44E-09 | Adipose_Subcutaneous            |
| rs9268832 | <i>XXbac-BPG254F23.6</i> | 6.46E-09 | Artery_Tibial                   |
| rs9268832 | <i>HLA-DQB1</i>          | 9.58E-09 | Esophagus_Mucosa                |
| rs9268832 | <i>HLA-DRB6</i>          | 1.05E-08 | Spleen                          |
| rs9268832 | <i>HLA-DQB1-AS1</i>      | 1.18E-08 | Skin_Sun_Exposed_Lower_leg      |
| rs9268832 | <i>HLA-DRB1</i>          | 1.19E-08 | Testis                          |
| rs9268832 | <i>HLA-DQA2</i>          | 1.63E-08 | Nerve_Tibial                    |
| rs9268832 | <i>HLA-DQB1</i>          | 1.79E-08 | Testis                          |
| rs9268832 | <i>HLA-DRB6</i>          | 2.01E-08 | Liver                           |
| rs9268832 | <i>HLA-DRB1</i>          | 2.91E-08 | Colon_Transverse                |
| rs9268832 | <i>HLA-DQA2</i>          | 3.33E-08 | Colon_Transverse                |
| rs9268832 | <i>HLA-DRB6</i>          | 3.75E-08 | Brain_Cerebellum                |
| rs9268832 | <i>HLA-DRB1</i>          | 3.84E-08 | Nerve_Tibial                    |
| rs9268832 | <i>HLA-DQA2</i>          | 4.39E-08 | Breast_Mammary_Tissue           |
| rs3115628 | <i>HCG4P5</i>            | 6.37E-24 | Adipose_Subcutaneous            |
| rs3115628 | <i>HCG4P5</i>            | 2.00E-23 | Whole_Blood                     |
| rs3115628 | <i>HCG4P5</i>            | 9.92E-19 | Skin_Sun_Exposed_Lower_leg      |
| rs3115628 | <i>HCG4P5</i>            | 6.01E-17 | Muscle_Skeletal                 |
| rs3115628 | <i>HCG4P5</i>            | 3.41E-16 | Skin_Not_Sun_Exposed_Suprapubic |
| rs3115628 | <i>HCG4P5</i>            | 9.86E-15 | Esophagus_Mucosa                |
| rs3115628 | <i>HCG4P5</i>            | 3.00E-14 | Lung                            |
| rs3115628 | <i>HCG4P5</i>            | 1.06E-13 | Thyroid                         |
| rs3115628 | <i>HCG4P5</i>            | 4.55E-13 | Nerve_Tibial                    |
| rs3115628 | <i>HLA-J</i>             | 1.03E-12 | Adipose_Subcutaneous            |
| rs3115628 | <i>HLA-J</i>             | 1.35E-12 | Thyroid                         |
| rs3115628 | <i>HCG4P5</i>            | 1.92E-12 | Artery_Tibial                   |
| rs3115628 | <i>HCG4P5</i>            | 4.10E-12 | Cells_Transformed_fibroblasts   |
| rs3115628 | <i>HLA-J</i>             | 8.98E-12 | Nerve_Tibial                    |
| rs3115628 | <i>HCG4P5</i>            | 1.28E-11 | Adipose_Visceral_Omentum        |
| rs3115628 | <i>HCG4P5</i>            | 2.88E-11 | Breast_Mammary_Tissue           |
| rs3115628 | <i>HCG4P5</i>            | 3.00E-11 | Esophagus_Muscularis            |
| rs3115628 | <i>HLA-J</i>             | 1.90E-10 | Artery_Tibial                   |

| <b>SNP</b> | <b>Correlated gene</b> | <b>p-value</b> | <b>Tissue</b>                       |
|------------|------------------------|----------------|-------------------------------------|
| rs3115628  | <i>HLA-K</i>           | 2.42E-10       | Brain_Frontal_Cortex_BA9            |
| rs3115628  | <i>HLA-K</i>           | 2.60E-10       | Testis                              |
| rs3115628  | <i>HCG4P5</i>          | 5.07E-10       | Colon_Transverse                    |
| rs3115628  | <i>HLA-H</i>           | 5.09E-10       | Cells_Transformed_fibroblasts       |
| rs3115628  | <i>HLA-K</i>           | 5.96E-10       | Skin_Sun_Exposed_Lower_leg          |
| rs3115628  | <i>HLA-J</i>           | 8.80E-10       | Muscle_Skeletal                     |
| rs3115628  | <i>HCG4P5</i>          | 1.38E-09       | Esophagus_Gastroesophageal_Junction |
| rs3115628  | <i>HLA-K</i>           | 1.56E-09       | Esophagus_Mucosa                    |
| rs3115628  | <i>HLA-J</i>           | 2.16E-09       | Whole_Blood                         |
| rs3115628  | <i>ZFP57</i>           | 2.38E-09       | Thyroid                             |
| rs3115628  | <i>HLA-H</i>           | 4.40E-09       | Brain_Cerebellum                    |
| rs3115628  | <i>ZFP57</i>           | 4.84E-09       | Artery_Aorta                        |
| rs3115628  | <i>ZFP57</i>           | 7.38E-09       | Muscle_Skeletal                     |
| rs3115628  | <i>HLA-H</i>           | 7.62E-09       | Artery_Tibial                       |
| rs3115628  | <i>HLA-J</i>           | 8.38E-09       | Skin_Sun_Exposed_Lower_leg          |
| rs3115628  | <i>HCG4P5</i>          | 1.84E-08       | Stomach                             |
| rs3115628  | <i>ZFP57</i>           | 3.08E-08       | Esophagus_Mucosa                    |
| rs3115628  | <i>HLA-H</i>           | 4.56E-08       | Skin_Sun_Exposed_Lower_leg          |

**Table S5.** Pair-wise LD analysis ( $r^2$ ) of the AOSD and JIA associated SNPs within the HLA region

|                            |                   | rs3094178 | rs9268791 | rs2395148 | rs41291794 | rs7775055 |
|----------------------------|-------------------|-----------|-----------|-----------|------------|-----------|
| <b>AOSD associated SNP</b> | <b>rs3094178</b>  | -         | 0.020     | 0.030     | 0.000      | 0.001     |
| <b>AOSD associated SNP</b> | <b>rs9268791</b>  | 0.020     | -         | 0.053     | 0.031      | 0.002     |
| <b>JIA associated SNP</b>  | <b>rs2395148</b>  | 0.030     | 0.053     | -         | 0.011      | 0.003     |
| <b>JIA associated SNP</b>  | <b>rs41291794</b> | 0.000     | 0.031     | 0.011     | -          | 0.004     |
| <b>JIA associated SNP</b>  | <b>rs7775055</b>  | 0.001     | 0.002     | 0.003     | 0.004      | -         |

The  $r^2$  metrics were estimated based on our data set using PLINK.

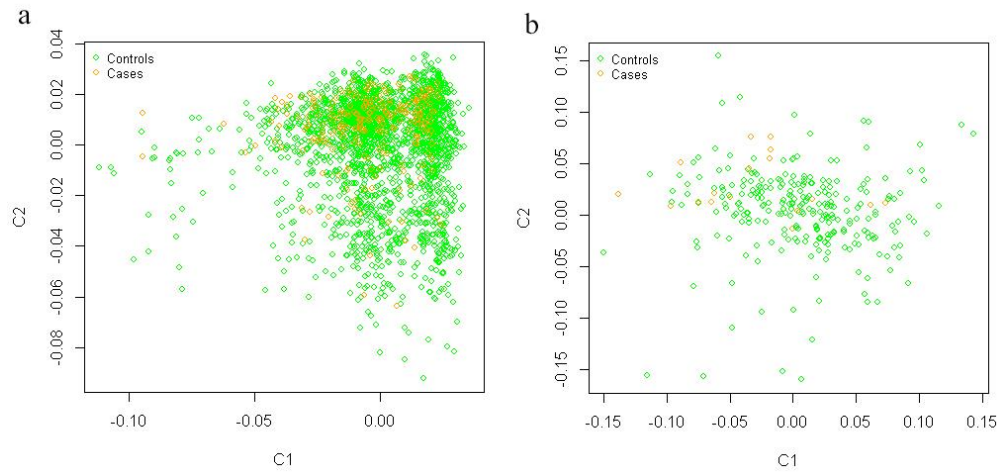

**Figure S1.** Plot of the first two principal components from principal components analysis of our sample. a) discovery: 247 cases versus 2,163 controls; b) replication: 17 cases versus 257 controls. The first principal component (C1, x axis) was plotted against the second principal component (C2, y axis). Controls are green circles and Cases are yellow circles.

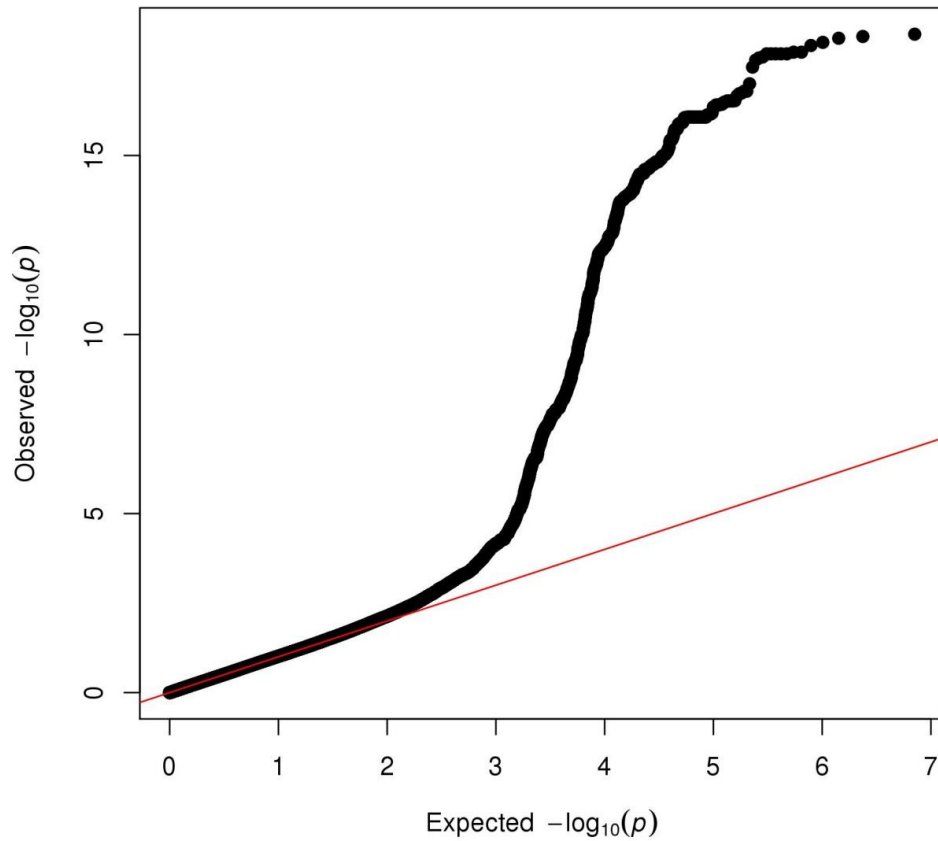

**Figure S2.** Quantile-quantile (Q-Q) plot of the GWAS analysis. The Q-Q plot representative of observed (y axis) vs. expected (x axis) SNP p values distribution. Expected p values are those expected under the null hypothesis, and the uniform null distribution is marked with a red line.

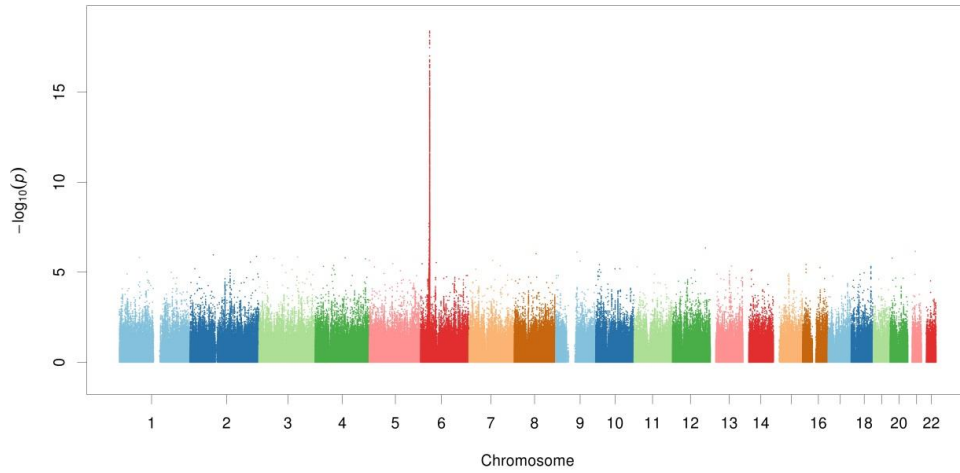

**Figure S3.** Manhattan plot of the GWAS analysis. Genome-wide P-values ( $-\log_{10}p$ , y axis) plotted against their respective chromosomal positions (x axis).

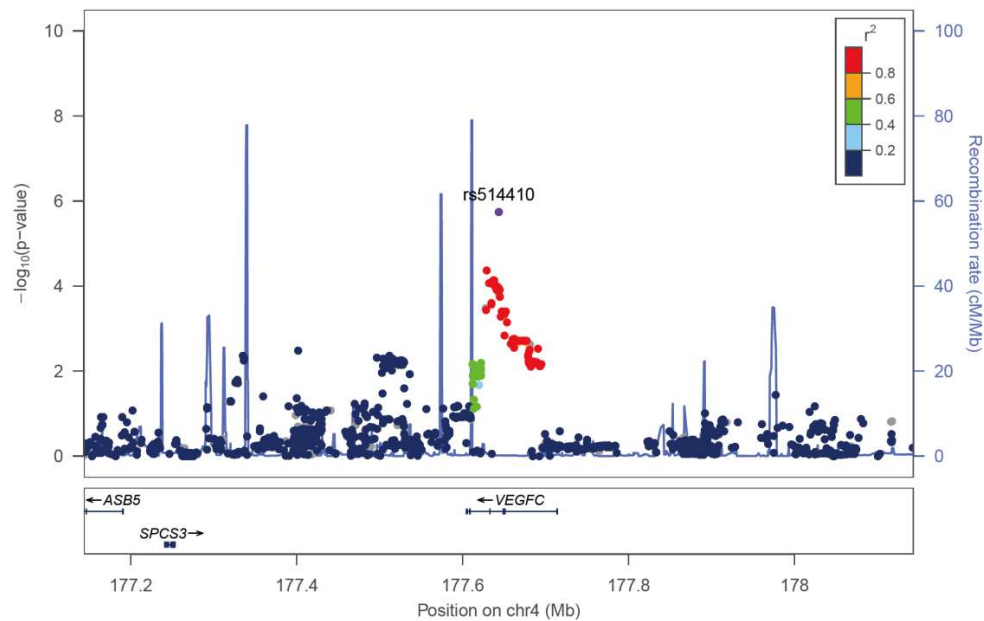

**Figure S4.** Regional association plot of the VEGFC region. Purple circles represent the most significantly associated SNPs (marker SNPs) in each region in the meta-analysis of discovery and replication.  $-\log_{10}p$  values (y axis) of the SNPs (within the regions spanning 500 kb on either side of the marker SNP) are presented according to the chromosomal positions of the SNPs (x axis, hg19). SNPs are colored according to their linkage disequilibrium (LD) with the marker SNP. The LD values were established based on the 1000 Genomes Asian (ASI) data (March 2012). Estimated recombination rates with samples from the 1000 Genomes Project March 2012 release are shown as blue lines, and the genomic locations of genes within the regions of interest annotated from the UCSC Genome Browser are shown as arrows.

## **Supplementary Methods**

### **Participants**

The clinical samples and information of Chinese AOSD patients were collected from several different centers/hospitals in China. For all cases, the clinical manifestations, laboratory testing, treatment response and follow-up were evaluated by rheumatologists from each collaborative center/hospital, and senior rheumatologists of Rui'jin Hospital re-evaluated the diagnoses and then ultimately pooled them in the database. All the included AOSD patients fulfilled Yamaguchi's diagnostic criteria<sup>[1]</sup>. The controls were healthy individuals recruited from the physical examination centers of the collaborative hospitals. After quality control (QC), this study included 264 AOSD cases and 2,420 geographically and ethnically matched healthy controls (discovery: 247 cases versus 2,163 controls, recruited from northern and central China; replication: 17 cases versus 257 controls, recruited from southern China). 64% of cases were female and the average age of onset was 35.6 years old. All samples were collected from AOSD patients at onset. The study was approved by the institution's ethics committees, and all participants signed informed written consent forms. Approval (Rui'jin Hospital Ethics Committee, 2016(62)) was received for our study from the local Ethics Committee of Human Genetic Resources.

### **DNA extraction**

EDTA-anticoagulated venous blood samples were collected from all participants. Genomic DNA was extracted from peripheral blood monocytes using FlexiGene DNA kits and was diluted to a working concentration of 50 ng/μl for array genotyping.

### **GWAS genotyping and quality control**



The genome-wide scan was performed using the Illumina Infinium Global Screening Array-24 v1.0 BeadChip. A total of 2,721 chips data were generated, and the genotyping data and inferred gender were generated using Illumina's GenomeStudio v2.0.2. Seven pairs of randomly selected sample replications were used to test reproducibility and yielded concordance rates >99% for all pairs. For each pair, only the one with the higher call rate was retained for further analysis. Before conducting the association analysis, systematic quality control analyses were performed at both the sample and single-nucleotide polymorphism (SNP) levels as follows: for the sample QC, (i) individuals had a discrepancy between the documented gender and the inferred gender based on genotyping data (n=3); (ii) heterozygosity rates were calculated, and deviations of more than 6 s.d. from the mean were excluded (n=0); (iii) identity-by-descent analysis was performed with PLINK<sup>[2]</sup>, and the member (with a lower call rate) of the pair of unexpected duplicates or probable relatives (PI\_HAT>0.25) was also excluded (n=12); and (iv) population outliers from principal component analysis (PCA) were removed (n=15). For the SNP QC, SNPs with the following characteristics were excluded: (i) had a call rate of <98% (n= 87,374); (ii) had minor allele frequencies (MAFs) <0.01 (n=299,180); (iii) had a genotype distribution in the controls that deviated from the expected Hardy-Weinberg equilibrium (HWE  $p < 1.0 \times 10^{-6}$ , n=31,856); or (iv) for SNPs with  $p < 1 \times 10^{-4}$ , failed genotyping assessed by visual inspection of cluster plot (n=1,906). After QC, a set of 367,536 genotyped SNPs in 264 cases and 2,420 controls remained for further imputation analysis.

### **Analysis of population substructure**

A linkage disequilibrium (LD)-based SNP pruning analysis was performed with

PLINK<sup>[2]</sup>. Using the LD-pruned autosomal SNPs genotypes, PCAs were conducted to evaluate the population substructure of the sample using EIGENSTRAT software<sup>[3]</sup>. We also removed population outliers, which were defined as individuals whose ancestry was more than 6 s.d. from the mean on one of the top 10 inferred axes of variation. In this step, 15 outliers were identified and removed.

### **Imputation analysis of untyped SNPs**

The entire genotyped set was imputed as follows: the genotypes were phased using SHAPEIT<sup>[4]</sup> for each chromosome, and imputation was performed for each 5-Mb chromosome interval using IMPUTE2<sup>[5]</sup>. The haplotypes derived from the 1000 Genomes Project Phase 3<sup>[6]</sup> were used as reference data. The variants with INFO>0.8, MAF>0.01, a call rate  $\geq 98\%$  and HWE  $p \geq 1 \times 10^{-6}$  in the controls were saved for further analysis. A set of 3,547,931 genetic variants for 264 AOSD cases and 2,420 controls remained in the final analysis.

### **Statistical methods**

For the single variant association analysis, we used logistic regression with PLINK<sup>[2]</sup>. We performed conditional analysis to test for independent effects of an individual variant using PLINK. Effects from different data sets were combined using meta-analysis under a fixed-effects model with inverse variance weighting. Heterogeneity was assessed using Cochran's Q test, and the  $I^2$  index was used to indicate the degree of heterogeneity. For rs514410, we also adopted the Cochran-Mantel-Haenszel analysis to combined discovery and replication samples<sup>[7, 8]</sup>. The regulatory and epigenomic annotation of the genome-wide significant SNPs were explored using HaploReg v4.1<sup>[9]</sup>. RegulomeDB v1.1 were used to assess their

potential functional consequence<sup>[10]</sup>.

### **Sanger sequencing confirmation**

To evaluate and correct possible genotyping or imputation error, we genotyped the three SNPs (rs9268791, rs3094178 and rs514410) using Sanger sequencing for cases (online supplementary table S1). The genotypes for array genotyping (rs514410) or imputation (rs9268791 and rs3094178) were corrected based on the Sanger sequencing if inconsistent genotypes observed (two cases for rs9268791, four cases for rs3094178, and seven cases for rs514410).

### **Supplementary Discussion**

SNP rs514410 is located within the intron of *VEGFC*. The *VEGFC* gene encodes vascular endothelial growth factor-C (VEGF-C). VEGF-C plays a crucial role in the development of lymphatic vessels and lymphangiogenesis<sup>[11]</sup>. VEGF-C also promotes the migration of mesenchymal stem cells and immune cells<sup>[12, 13]</sup>, which are known to play key roles in the immune response. AOSD patients usually show lymphadenopathy, splenomegaly and proliferation of bone marrow cells and synovial tissue<sup>[14]</sup>. This kind of acute proliferation at onset might be triggered by abnormal stimulatory cytokine release and related uncontrolled response or signaling pathway activation. VEGF-C was involved in the maintenance of interferon-related immune balance<sup>[15]</sup>. In addition, VEGF-C signaling plays a key role in regulating toll-like receptor 4 (TLR4)-triggered inflammation in macrophages. In AOSD patients, the endogenous TLR4 ligand S100A8/A9 levels were significantly elevated and correlated with disease activity<sup>[16]</sup>. The innate immune processes involving S100A8/A9 have an important role in the pathogenesis of AOSD<sup>[16]</sup>. This evidence

indicated pleiotropy and multifunctionality for VEGF-C, and suggested their functional relevance for AOSD.

**Abbreviations List**

AOSD, Adult-Onset Still's Disease;

JIA, juvenile idiopathic arthritis;

HLA, human leukocyte antigen;

VEGF-C, vascular endothelial growth factor-C;

GWS, genome-wide significance;

OR, odds ratio;

GWAS, genome-wide association study;

eQTL, expression quantitative trait loci;

EDTA, ethylenediaminetetraacetic acid;

QC, quality control;

PCA, principal component analysis;

SNP, single-nucleotide polymorphism;

LD, linkage disequilibrium;

HWE, Hardy-Weinberg equilibrium;

MAF, minor allele frequency;

TLR4, toll-like receptor 4;

Q-Q, Quantile-quantile.

## References

1. Yamaguchi M, Ohta A, Tsunematsu T, Kasukawa R, Mizushima Y, Kashiwagi H, et al. Preliminary criteria for classification of adult Still's disease. *The Journal of rheumatology*. 1992 1992-Mar; 19(3):424-430.
2. Chang CC, Chow CC, Tellier LCAM, Vattikuti S, Purcell SM, Lee JJ. Second-generation PLINK: rising to the challenge of larger and richer datasets. *Gigascience*. 2015 Feb 25; 4(1):7.
3. Price AL, Patterson NJ, Plenge RM, Weinblatt ME, Shadick NA, Reich D. Principal components analysis corrects for stratification in genome-wide association studies. *Nature Genetics*. 2006 Aug; 38(8):904-909.
4. Delaneau O, Zagury J-F, Marchini J. Improved whole-chromosome phasing for disease and population genetic studies. *Nature Methods*. 2012; 10(1):5-6.
5. Howie BN, Donnelly P, Marchini J. A flexible and accurate genotype imputation method for the next generation of genome-wide association studies. *PLoS Genetics*. 2009; 5(6):e1000529.
6. Altshuler DM, Durbin RM, Abecasis GR, Bentley DR, Chakravarti A, Clark AG, et al. A global reference for human genetic variation. *Nature*. 2015 Oct 1; 526(7571):68-74.
7. Anttila V, Stefansson H, Kallela M, Todt U, Terwindt GM, Calafato MS, et al. Genome-wide association study of migraine implicates a common susceptibility variant on 8q22.1. *Nature Genetics*. 2010 Oct; 42(10):869-873.
8. Wiberg RAW, Gaggiotti OE, Morrissey MB, Ritchie MG. Identifying consistent allele frequency differences in studies of stratified populations. *Methods in Ecology and Evolution*. 2017 Dec; 8(12):1899-1909.
9. Ward LD, Kellis M. HaploReg: a resource for exploring chromatin states,

- conservation, and regulatory motif alterations within sets of genetically linked variants. *Nucleic Acids Research*. 2012 Jan; 40(D1):D930-D934.
10. Boyle AP, Hong EL, Hariharan M, Cheng Y, Schaub MA, Kasowski M, et al. Annotation of functional variation in personal genomes using RegulomeDB. *Genome Research*. 2012 Sep; 22(9):1790-1797.
  11. Karkkainen MJ, Haiko P, Sainio K, Partanen J, Taipale J, Petrova TV, et al. Vascular endothelial growth factor C is required for sprouting of the first lymphatic vessels from embryonic veins. *Nature Immunology*. 2004 Jan; 5(1):74-80.
  12. Ishii M, Takahashi M, Murakami J, Yanagisawa T, Nishimura M. Vascular endothelial growth factor-C promotes human mesenchymal stem cell migration via an ERK-and FAK-dependent mechanism. *Molecular and cellular biochemistry*. 2019 2019 May; 455(1-2):185-193.
  13. Bouta EM, Bell RD, Rahimi H, Xing L, Wood RW, Bingham CO, III, et al. Targeting lymphatic function as a novel therapeutic intervention for rheumatoid arthritis. *Nature Reviews Rheumatology*. 2018 Feb; 14(2):94-106.
  14. Giacomelli R, Ruscitti P, Shoenfeld Y. A comprehensive review on adult onset Still's disease. *Journal of Autoimmunity*. 2018 Sep; 93:24-36.
  15. Ning F, Li X, Yu L, Zhang B, Zhao Y, Liu Y, et al. Hes1 attenuates type I IFN responses via VEGF-C and WDFY1. *The Journal of experimental medicine*. 2019 2019 Jun 3; 216(6):1396-1410.
  16. Kim H-A, Han JH, Kim W-J, Noh HJ, An J-M, Yim H, et al. TLR4 Endogenous Ligand S100A8/A9 Levels in Adult-Onset Still's Disease and Their Association with Disease Activity and Clinical Manifestations. *International Journal of Molecular Sciences*. 2016 2016 Aug 16; 17(8):1342.
